# Supplementary material
Source: PubMed Central journal article supplement (PMC4201958)
Supplement: NIHMS628103-supplement-1.pdf [file NIHMS628103-supplement-1.pdf]

# Supplemental Figure 1

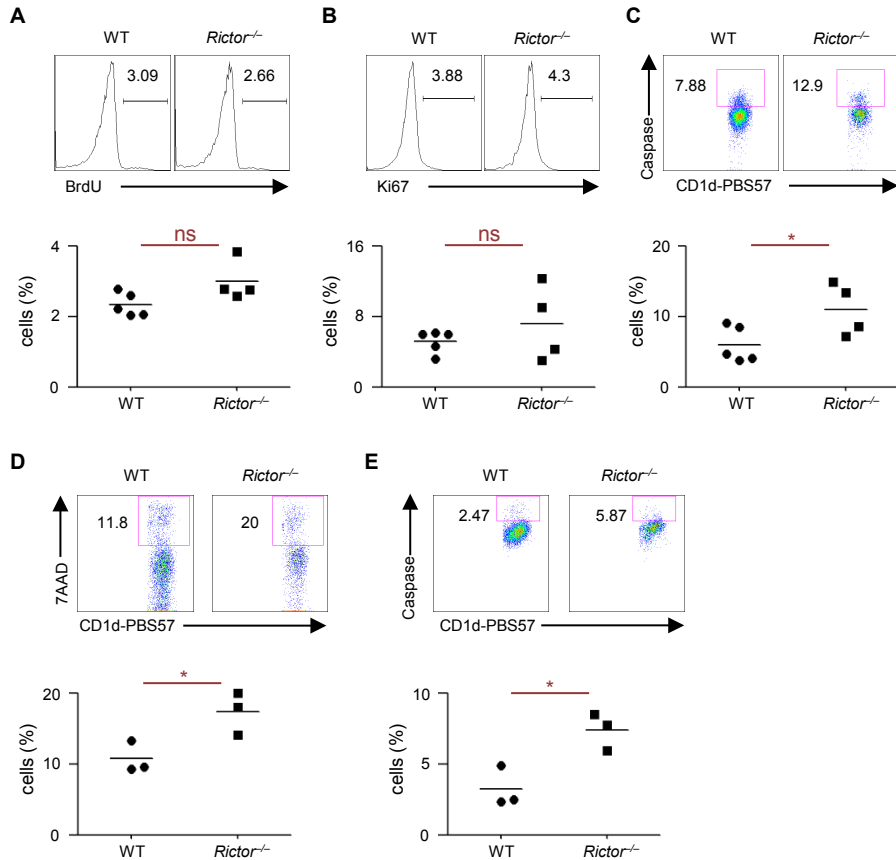

**Supplemental Figure 1.** Effects of Rictor deficiency on cell survival and proliferation. Thymocytes were from WT and *Rictor*<sup>-/-</sup> mice. **(A)** BrdU staining of thymic iNKT cells from the mice pulsed with BrdU for 20 h. **(B)** Intracellular staining of Ki67 in thymic iNKT cells. **(C)** Caspase activity in iNKT cells as determined by z-VAD-Fmk staining. **(D and E)** Cell death of iNKT cells after *in vitro* stimulation with  $\alpha$ -GalCer for 72 h, as measured by 7-AAD staining **(D)** and Caspase activity **(E)**. Results are representative of 2-3 independent experiments. \*,  $p < 0.05$ .

**Supplemental Figure 2**

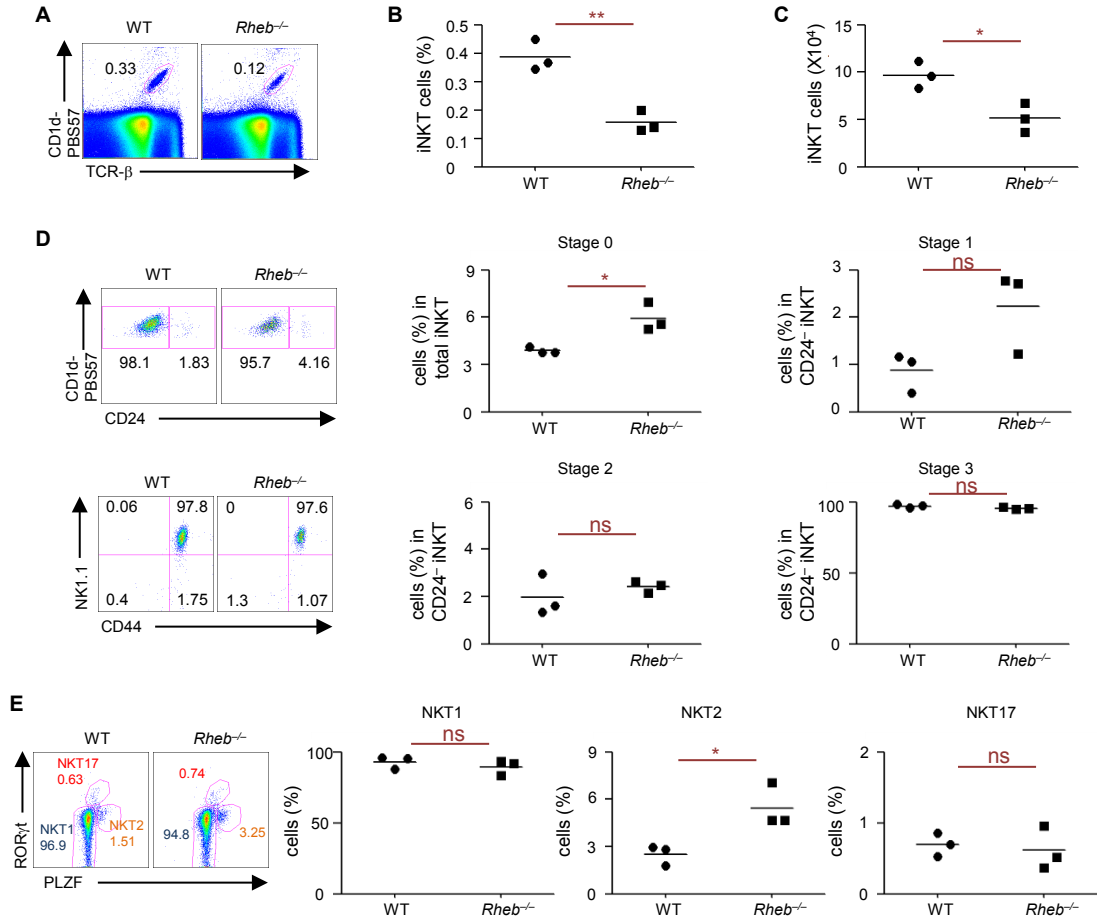

**Supplemental Figure 2.** Effects of Rheb deficiency on iNKT cell development and lineage decisions. Thymocytes were from WT and *Rheb*<sup>-/-</sup> mice. **(A)** Flow cytometry of iNKT cells (CD1d-PBS57<sup>+</sup>TCR-β<sup>+</sup>) in the thymus. Percentages **(B)** and numbers **(C)** of iNKT cells in the thymus are shown. **(D)** Analysis of iNKT cell developmental stages in the thymus. **(E)** Intracellular staining of PLZF and RORγt in iNKT cells from the thymus. Results are representative of 2-4 independent experiments. \*, p<0.05; \*\*, p<0.01.
